# Supplementary material for: Primary restriction of S‐RNase cytotoxicity by a stepwise ubiquitination and degradation pathway in Petunia hybrida
Source: PubMed Central journal article supplement (PMC8361771; doi:10.1111/nph.17438), 2021-05-30
Supplement: NPH-231-1249-s001.pdf [file NPH-231-1249-s001.pdf]

1 ***New Phytologist* Supporting Information**

2 Article title: Primary restriction of S-RNase cytotoxicity by a stepwise ubiquitination  
3 and degradation pathway in *Petunia hybrida*

4 Authors: Hong Zhao, Yanzhai Song, Junhui Li, Yue Zhang, Huaqiu Huang, Qun Li,  
5 Yu'e Zhang, Yongbiao Xue

6 Article acceptance date: 20 April 2021

7

8 The following Supporting Information is available for this article:

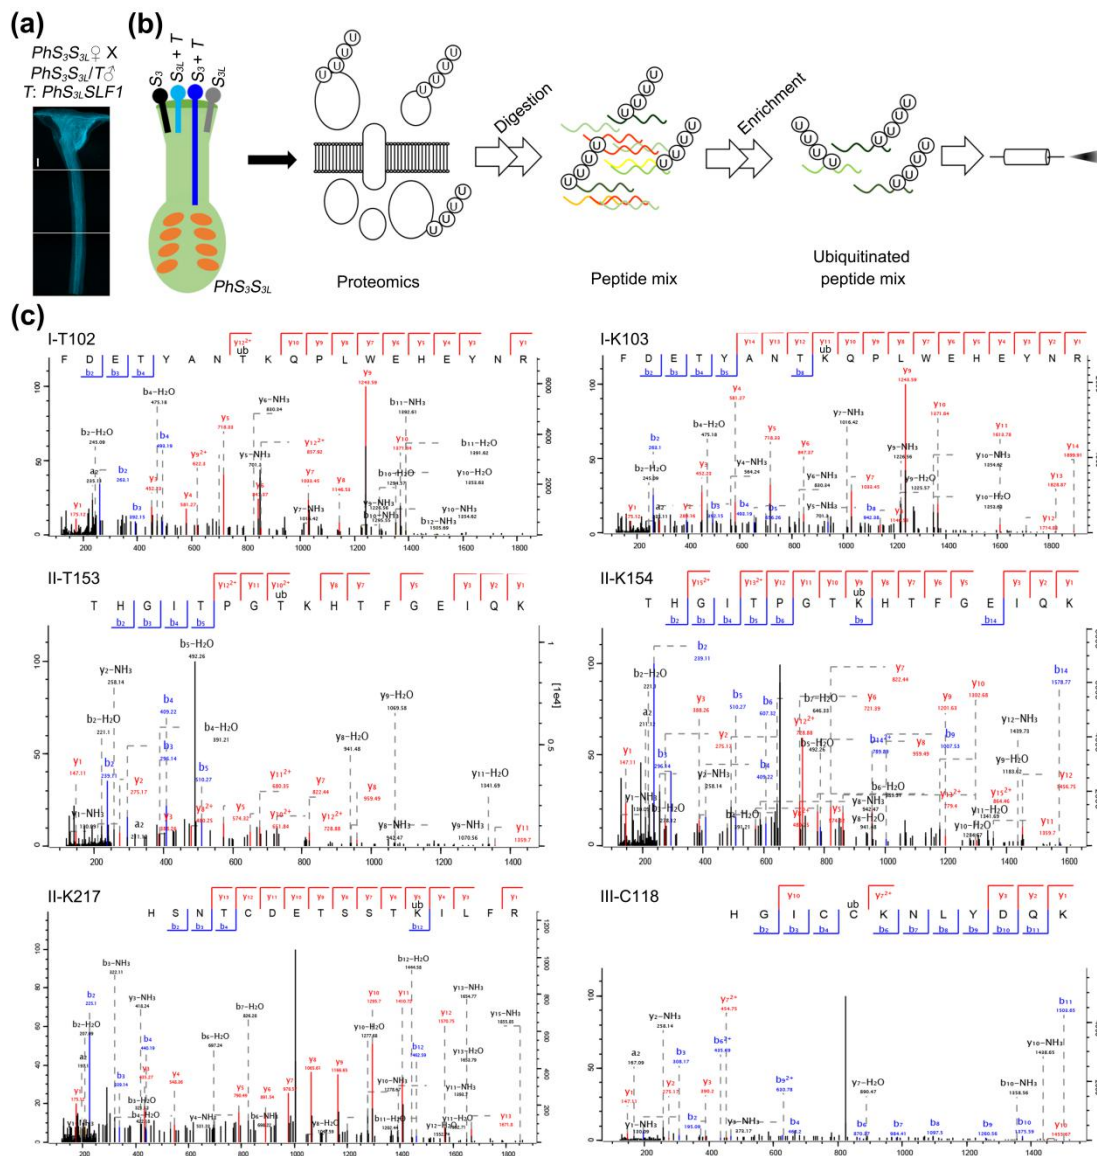

9  
 10 **Fig. S1. Identification of six ubiquitinated residues of *Petunia hybrida* S<sub>3</sub>-RNase**  
 11 **by LC-MS/MS analysis of cross-pollinated pistils. (a)** Aniline blue staining of  
 12 pollen tubes in a wild-type (*PhS<sub>3</sub>S<sub>3L</sub>*) pistil cross-pollinated with transgenic pollen  
 13 containing *PhS<sub>3L</sub>SLF1* (*PhS<sub>3</sub>S<sub>3L</sub>/PhS<sub>3L</sub>SLF1*). Bar: 1 mm. **(b)** A flow chart of  
 14 LC-MS/MS. *PhS<sub>3</sub>S<sub>3L</sub>* pistils pollinated with cross pollen of *PhS<sub>3</sub>S<sub>3L</sub>/PhS<sub>3L</sub>SLF1*  
 15 containing transgenic *PhS<sub>3L</sub>SLF1* (T) are collected for protein extraction, digestion,  
 16 ubiquitinated peptide enrichment and LC-MS/MS. **(c)** Tandem mass spectrometry  
 17 (MS/MS) of ubiquitinated PhS<sub>3</sub>-RNase peptide. Horizontal and vertical axes  
 18 represent m/z and signal strengths, respectively. I, II and III indicate three  
 19 ubiquitinated regions of PhS<sub>3</sub>-RNase. T, K and C indicate threonine, lysine and  
 20 cysteine.





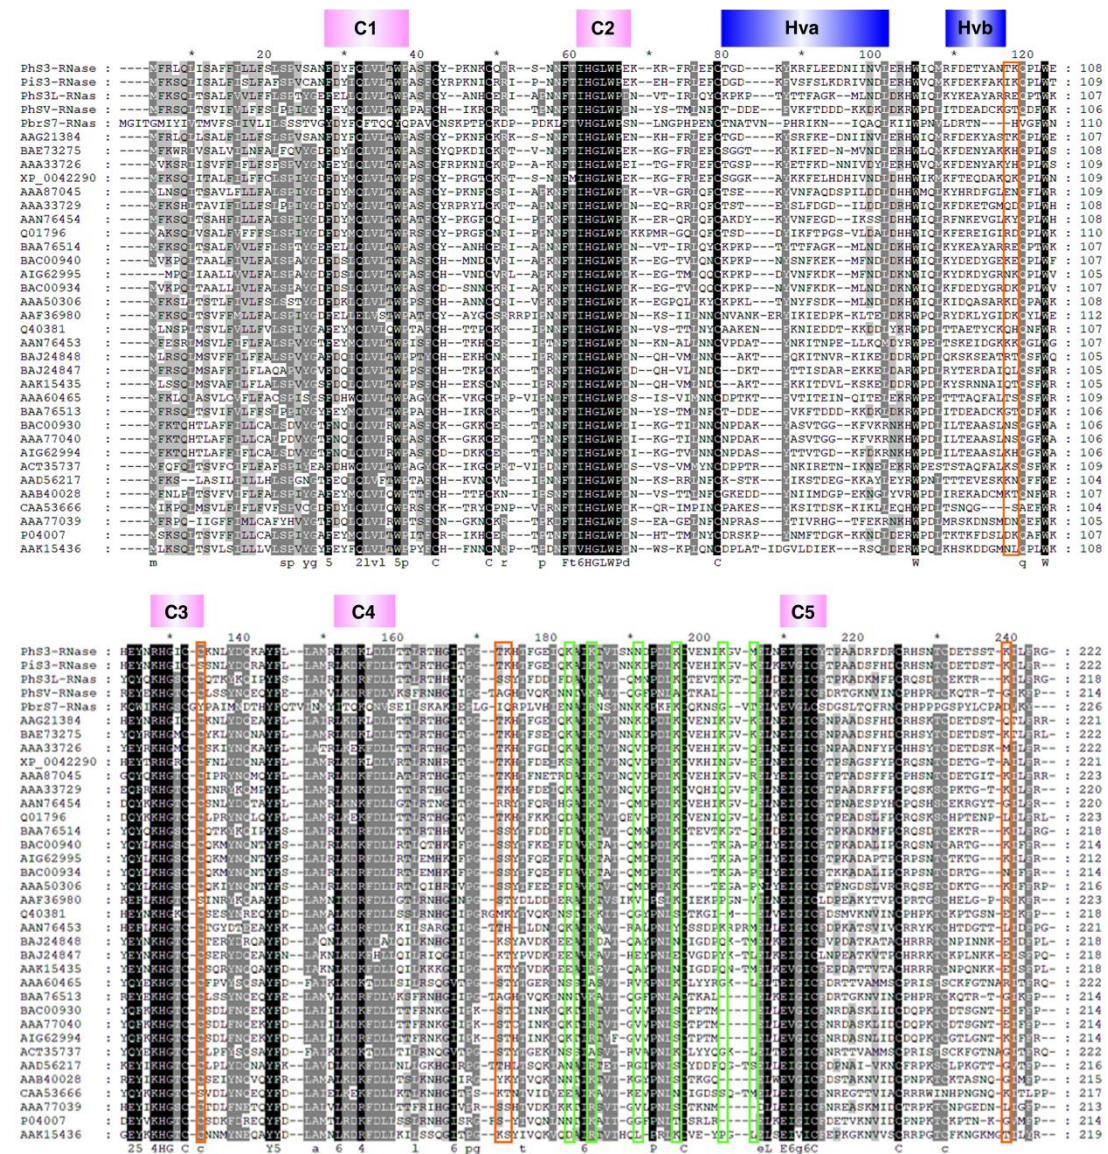

28  
 29 **Fig. S3. Locations of six ubiquitinated residues of *Petunia hybrida* S<sub>3</sub>-RNase in**  
 30 **Solanaceous S-RNases.** Amino acid sequence alignments of 36 S-RNases in  
 31 Solanaceae. C1-C5, five conserved regions; Hva and Hvb, hypervariable region a  
 32 and b. The black shadow indicates highly conserved sequences and the light less  
 33 conserved ones. The orange rectangles indicate the ubiquitination sites of  
 34 Phs3-RNase, the green the major lysine residues identified previously (Hua and Kao,  
 35 2008) responsible for the ubiquitination and degradation of *Petunia inflata* S<sub>3</sub>-RNase  
 36 and their corresponding amino acids among the 36 S-RNases.

37  
 38 Hua, Z., and Kao, T.-H. 2008. Identification of major lysine residues of S<sub>3</sub>-RNase of *Petunia inflata* involved in  
 39 ubiquitin-26S proteasome-mediated degradation *in vitro*. *Plant Journal* 54, 1094-1104.

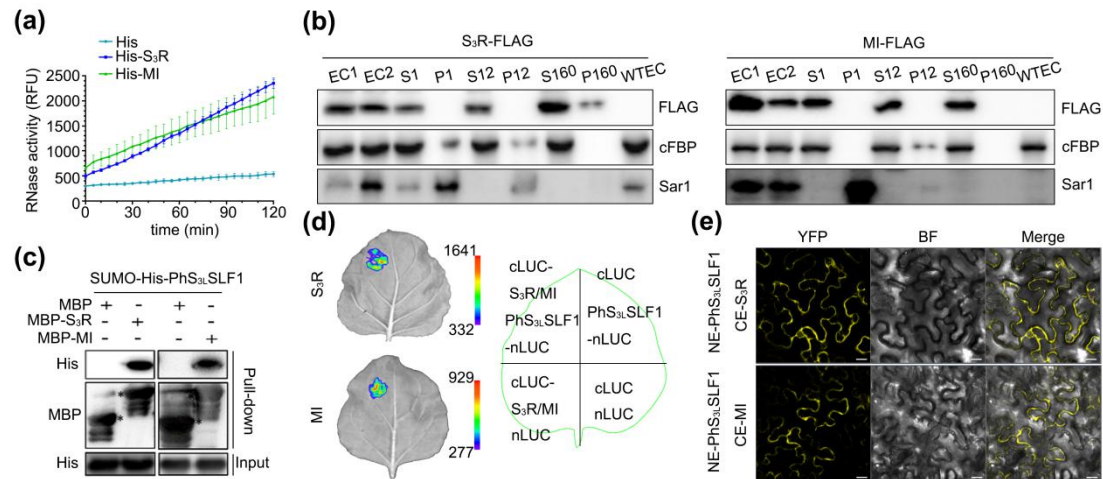

40

41 **Fig. S4. *Petunia hybrida* S<sub>3</sub>-RNase with the mutated region (R) I displays largely**  
 42 **unaltered biochemical and physical properties. (a)** RNase activity detection of  
 43 His-S<sub>3</sub>R and -mutant (M) I expressed by *pCold-TF* vectors. The relative fluorescence  
 44 unit (RFU) indicating RNase activity during a time course experiment is shown as  
 45 mean ± S.D. (n = 3). I: the ubiquitinated region I of PhS<sub>3</sub>-RNase. **(b)** Immunoblot  
 46 detection of FLAG-tagged S<sub>3</sub>R and MI in subcellular fractions of *in vitro* germinated  
 47 pollen tubes. EC1, EC2 and WTEC indicate entire cell homogenates of the pistils  
 48 from the transgenic plants containing *S<sub>3</sub>R-FLAG* or *MI-FLAG*, the pollen tubes of  
 49 *PhS<sub>V</sub>S<sub>V</sub>* treated with EC1 and the pistils from wild-type *PhS<sub>3</sub>S<sub>3L</sub>*. WTEC was a  
 50 negative control. S1 and P1, S12 and P12, S160 and P160 indicate supernatant and  
 51 pellet fractions obtained by centrifugation of EC2 at 1,000 g, 12,000 g and 160,000 g,  
 52 respectively. cFBP and Sar1 are marker antibodies of cytosol and endoplasmic  
 53 reticulum (ER), respectively. **(c)** Physical interactions between PhS<sub>3L</sub>SLF1 and S<sub>3</sub>R  
 54 and MI detected by pull-down assays. Input and pull-down: bait protein  
 55 SUMO-His-PhS<sub>3L</sub>SLF1 and prey proteins detected by immunoblots, respectively.  
 56 MBP and SUMO-His are protein tags. Asterisks indicate bands of target proteins. **(d)**  
 57 Split firefly luciferase complementation (SFLC) assay. The numbers on the left side  
 58 of the color signal bars represent the values of the fluorescent signal. The injection  
 59 positions of each component on tobacco leaves are indicated in the contour diagram  
 60 of leaf margin. nLUC and cLUC: transiently expressed N-terminal and C-terminal  
 61 regions of luciferase. **(e)** Bimolecular fluorescence complementation (BiFC) assays.

62 NE and CE: transiently expressed N-terminal and C-terminal regions of YFP by  
63 *pSPYNE* and *pSPYCE* vectors. YFP, BF and Merge represent the YFP fluorescence,  
64 bright field and their merged field, respectively. Bars: 20  $\mu\text{m}$ .

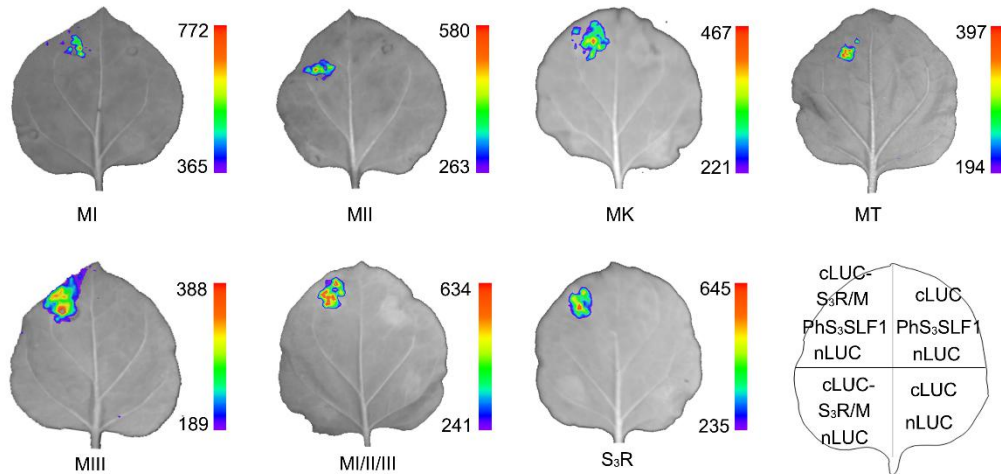

65

66 **Fig. S5. Physical interactions between *Petunia hybrida* S<sub>3</sub>R/Mutant (M) and**  
 67 **PhS<sub>3</sub>SLF1.** S<sub>3</sub>R/M represents wild-type or a mutant form of PhS<sub>3</sub>-RNase. I, II and  
 68 III indicate three ubiquitinated regions of PhS<sub>3</sub>-RNase. K and T indicate lysine and  
 69 threonine within six ubiquitinated residues of PhS<sub>3</sub>-RNase. nLUC and cLUC indicate  
 70 transiently expressed N-terminal and C-terminal regions of luciferase. The other  
 71 annotations of this figure are identical to those of Fig. S4d.



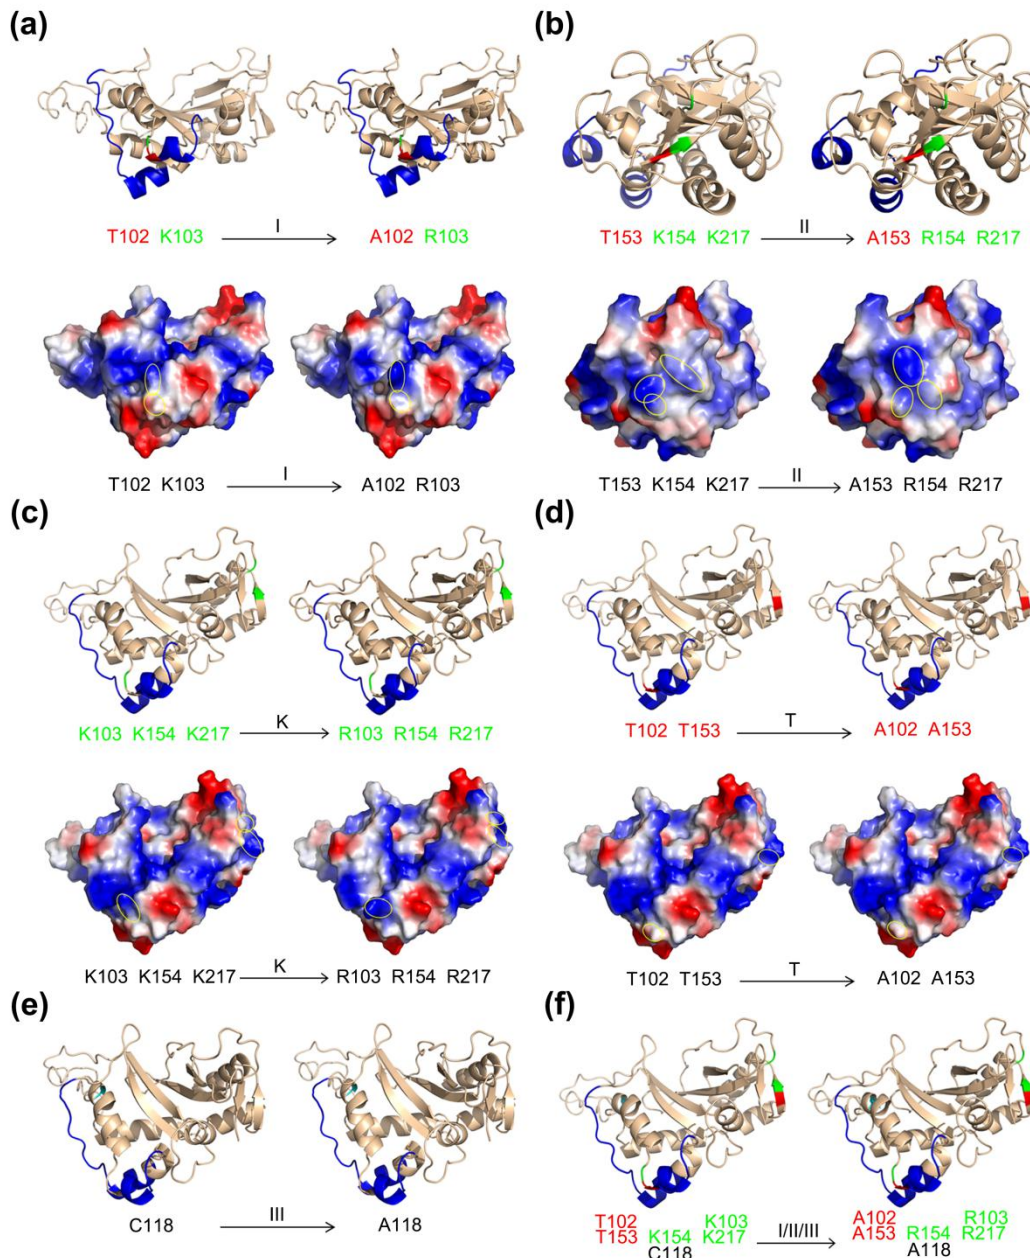

72

73 **Fig. S6. Predicted three dimensional (3D) structures and surface electrostatic**  
 74 **potentials of *Petunia hybrida* S<sub>3</sub>-RNases with mutated ubiquitinated residues.**

75 **(a-d)** Predicted 3D structures (top) and surface electrostatic potentials (bottom) of

76 PhS<sub>3</sub>-RNase (left) and its mutant (M) forms (right). **(e,f)** Predicted 3D structures of

77 PhS<sub>3</sub>-RNase (left) and MIII (right) **(e)** or PhS<sub>3</sub>-RNase (left) and MI/II/III (right) **(f)**.

78 For the predicted 3D structures, blue indicates the hypervariable Hv regions, red T

79 (threonine) and its mutant form A (alanine), and green K (lysine) and its mutant form

80 R (arginine). For the predicted surface electrostatic potentials, blue and red indicate



- 81 positive and negative charges, respectively. I, II and III indicate three ubiquitinated  
82 regions of PhS<sub>3</sub>-RNase.

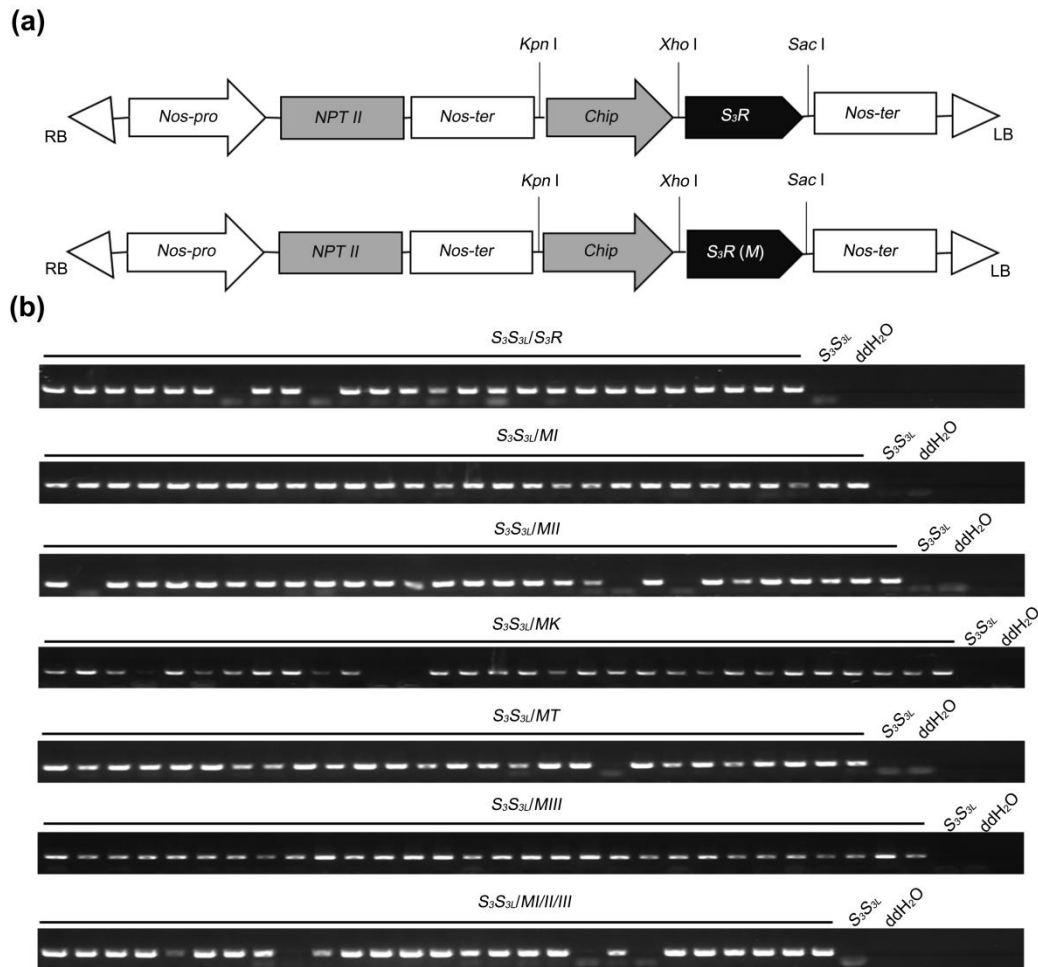

83

84 **Fig. S7. *Petunia hybrida* *S<sub>3</sub>R* and *S<sub>3</sub>R (Mutant) (M)* transgenes identification by**  
 85 **PCR analysis. (a)** Schematic diagrams of plant expression constructs containing *S<sub>3</sub>R*  
 86 or *S<sub>3</sub>R (M)* driven by a pistil-specific promoter *Chip* between right and left borders  
 87 of T-DNA. *NPTII*, neomycin phospho-transferase II gene conferring kanamycin  
 88 resistance. *Nos-pro* and *Nos-ter*, promoter and terminator of Nopaline synthase gene,  
 89 respectively. *S<sub>3</sub>R (M)* represents a mutant form of *S<sub>3</sub>R*. (b) Identification of T<sub>0</sub>  
 90 transgenic plants by genomic polymerase chain reaction (PCR). I, II and III: three  
 91 ubiquitinated regions of PhS<sub>3</sub>-RNase. K and T: lysine and threonine within six  
 92 ubiquitinated residues of PhS<sub>3</sub>-RNase. *S<sub>3</sub>S<sub>3L</sub>*: wild type and a negative control. H<sub>2</sub>O:  
 93 a negative control.

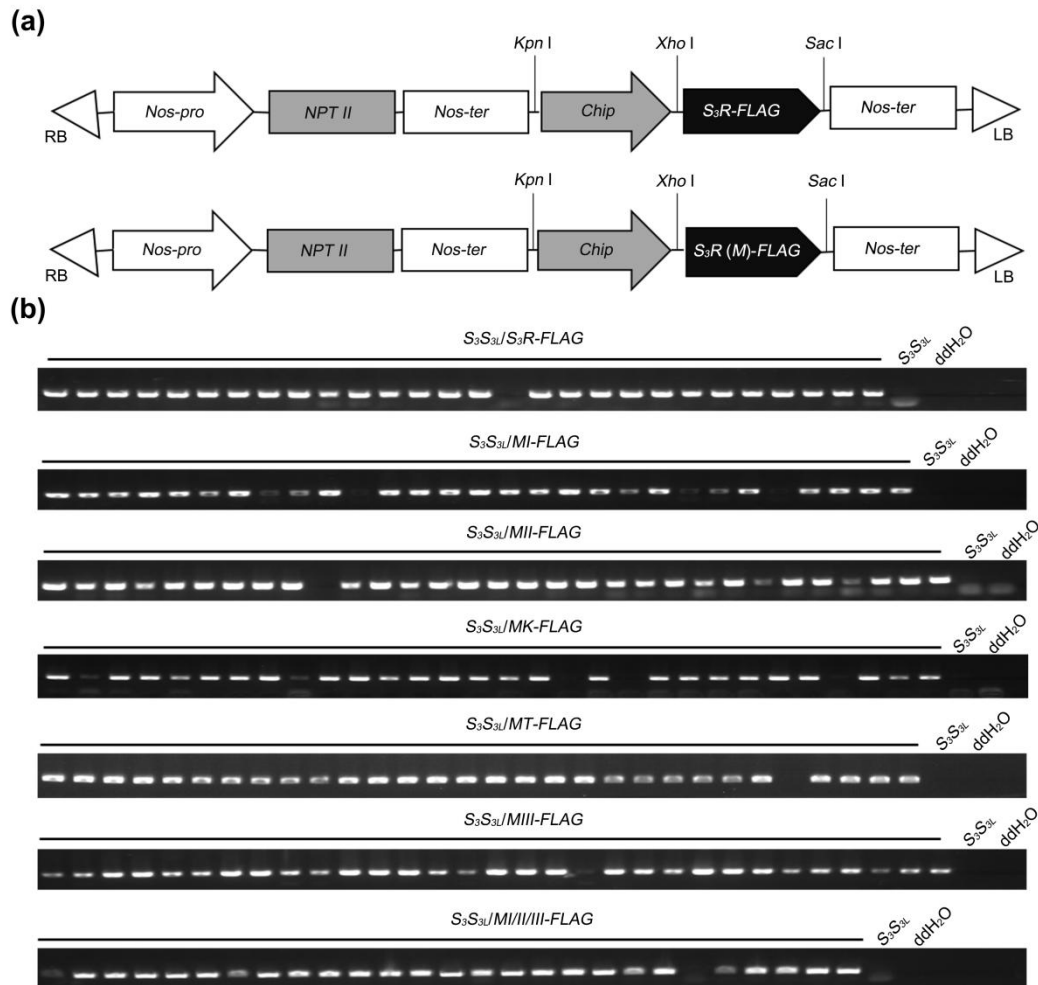

94

95 **Fig. S8. Identification of *FLAG*-tagged *Petunia hybrida* *S<sub>3</sub>R* and *S<sub>3</sub>R (Mutant)***

96 **(M) transgenes by PCR analysis. (a)** Schematic diagrams of plant expression

97 constructs containing *S<sub>3</sub>R-FLAG* or *S<sub>3</sub>R (M)-FLAG*. *NPTII*, neomycin

98 phospho-transferase II gene. *Nos-pro* and *Nos-ter*, promoter and terminator of

99 Nopaline synthase gene. **(b)** Identification of T<sub>0</sub> transgenic plants by genomic PCR. I,

100 II and III, three ubiquitinated regions of PhS<sub>3</sub>-RNase. K and T, lysine and threonine

101 within six ubiquitinated residues of PhS<sub>3</sub>-RNase. Annotations of this figure are

102 identical to those of Fig. S7.

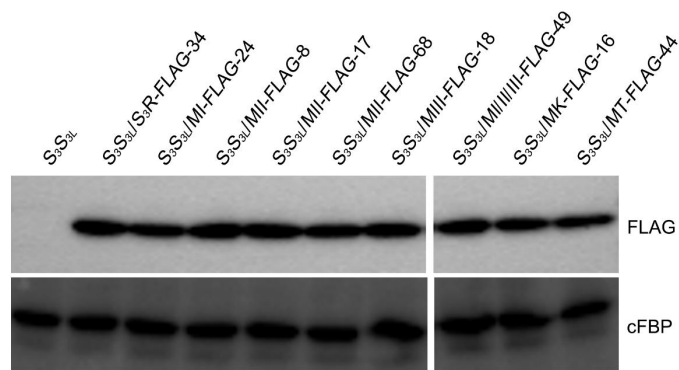

103

104 **Fig. S9. Detection of *FLAG*-tagged *Petunia hybrida* *S<sub>3</sub>R* and *S<sub>3</sub>R* (Mutant) (*M*)**

105 **transgenes expression by immunoblots.** The genotypes and numbers of the

106 transgenic lines are indicated on top. *S<sub>3</sub>S<sub>3L</sub>* is wild type used as a negative control. I,

107 II and III: three ubiquitinated regions of Ph*S<sub>3</sub>*-RNase. K and T: lysine and threonine

108 within six ubiquitinated residues of Ph*S<sub>3</sub>*-RNase. FLAG and cFBP antibodies were

109 used to detect the transgene expression and sample loading, respectively.



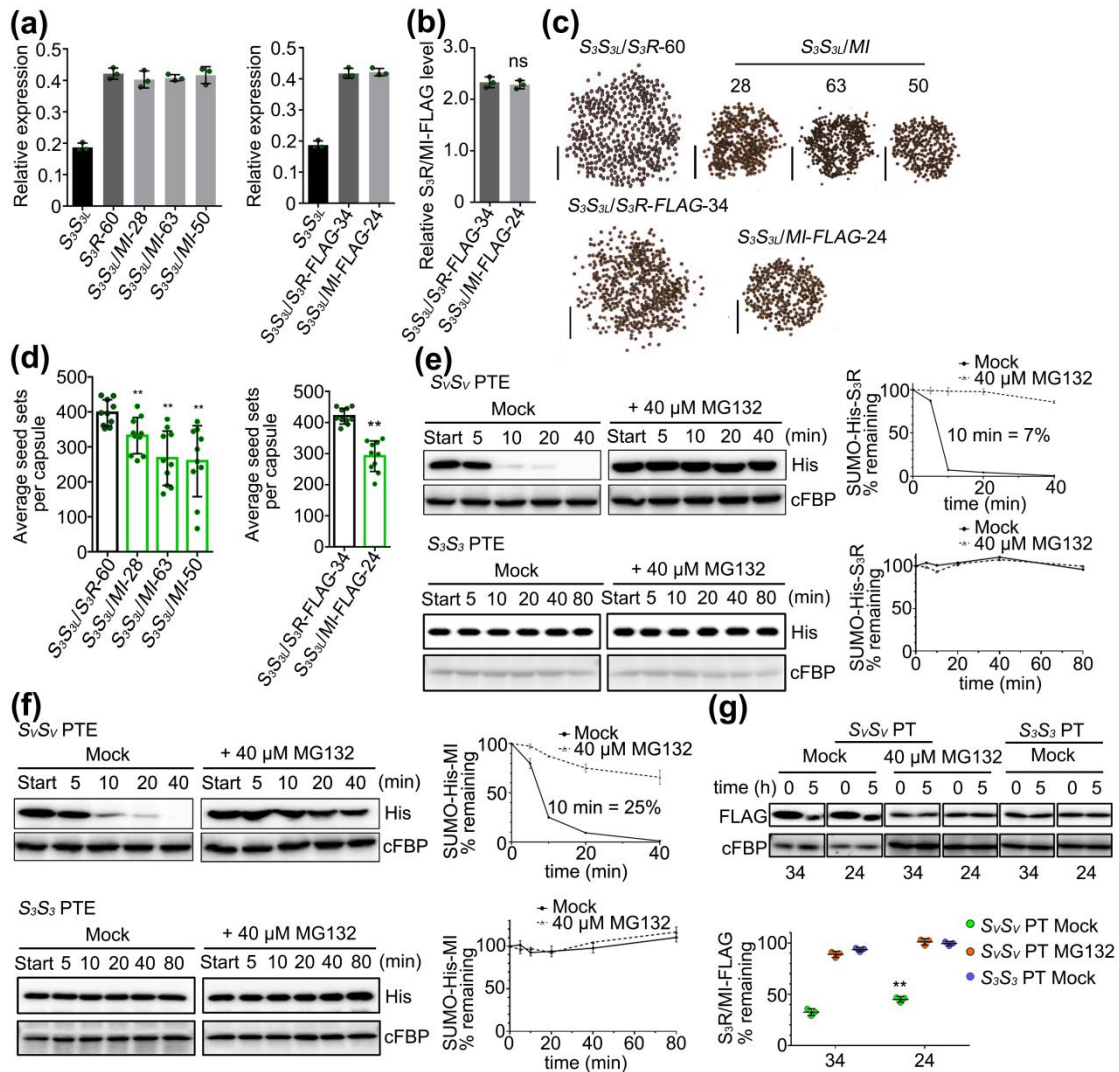

110

111 **Fig. S10. *Petunia hybrida*  $S_3$ -RNase with the mutated region (R) I slightly**  
 112 **reduces cross seed sets. (a)** Transcripts of transgene (*PhS<sub>3</sub>-RNase* or mutant (*M*) *I*)  
 113 and native *PhS<sub>3</sub>-RNase* detected by qRT-PCR. The  $T_0$  transgenic lines are indicated  
 114 below the horizontal axes.  $S_3S_3L$  is wild type. Data are shown as mean  $\pm$  S.D. (n = 3).  
 115 **(b)** Quantitative analyses of FLAG-tagged  $S_3R$  and  $MI$  proteins detected by  
 116 immunoblots in Fig. S9. Data are shown as mean  $\pm$  S.D. (n = 3). A student's *t*-test  
 117 was used to generate the *p* values. ns (not significant), *p* > 0.05. **(c)** Reduced seed set  
 118 per capsule from cross-pollinated  $T_0$  transgenic lines containing *MI* or *MI-FLAG*.  
 119 The transgenic plants containing  $S_3R$  or *MI* and  $S_3R-FLAG$  or *MI-FLAG* were  
 120 pollinated with cross pollen of *PhS<sub>3V</sub>S<sub>3V</sub>*. Numbers below the horizontal lines indicate  
 121  $T_0$  transgenic line numbers. Bars: 5 mm. **(d)** Statistical analyses of seed sets per

122 capsule from T<sub>0</sub> transgenic lines cross-pollinated with *PhS<sub>V</sub>S<sub>V</sub>* pollen. Data are  
123 shown as mean ± S.D. (n = 10). A student's *t*-test was used to generate the *p* values.  
124 \*\*, *p* < 0.01. **(e)** and **(f)** Cell-free degradation of recombinant SUMO-His-tagged S<sub>3</sub>R  
125 or MI by pollen-tube extracts (PTE) of *PhS<sub>V</sub>S<sub>V</sub>* (cross) or *PhS<sub>3</sub>S<sub>3</sub>* (self). Left,  
126 immunoblots of the reaction products incubated with or without MG132 (Mock).  
127 Start, time point zero in each degradation assay. cFBP antibody was used to detect  
128 non-degraded loading control. Right, quantitative analyses of the degradation rates.  
129 Data are shown as mean ± S.D. (n = 3). The remaining amount at 10 min is indicated.  
130 **(g)** Time-course analyses of PhS<sub>3</sub>R- and MI-FLAG levels in the cross- (*PhS<sub>V</sub>S<sub>V</sub>*) or  
131 self- (*PhS<sub>3</sub>S<sub>3</sub>*) pollen tubes (PT) incubated with or without MG132 (Mock). Top,  
132 immunoblots of PhS<sub>3</sub>R- or MI-FLAG in the PT using FLAG antibody. cFBP was  
133 detected as a loading control. The numbers at the bottom indicate the transgenic line  
134 numbers corresponding to those in **d**. Bottom, quantitative analyses of the  
135 immunoblots. Data are shown as mean ± S.D. (n = 3). A student's *t*-test was used to  
136 generate the *p* values. \*\*, *p* < 0.01.

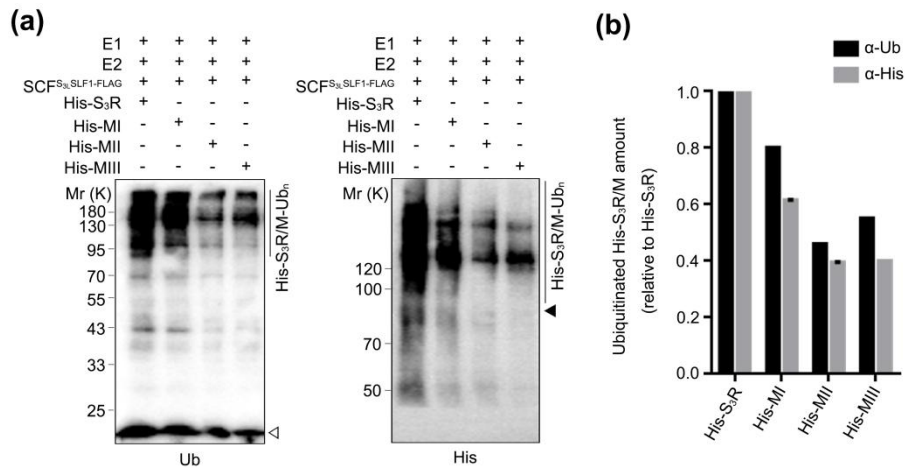

137

138 **Fig. S11. Decreased ubiquitination amount of mutant (M) I, II and III mediated**  
 139 **by SCF<sup>S<sub>3L</sub>SLF1</sup> of *Petunia hybrida*. (a)** Immunoblot detection of *in vitro* ubiquitinated  
 140 recombinant His-tagged S<sub>3</sub>R and its mutant forms using anti-ubiquitin (Ub) and -His  
 141 antibodies. His-S<sub>3</sub>R, -MI, -MII and -MIII are labeled as the substrates. I, II and III:  
 142 three ubiquitinated regions of PhS<sub>3</sub>-RNase. FLAG: a protein tag. PhS<sub>3</sub>R/M indicates  
 143 wild-type or a mutant form of PhS<sub>3</sub>-RNase. The vertical lines illustrate the  
 144 ubiquitinated His-S<sub>3</sub>R/M. Open and filled arrowheads indicate ubiquitin and  
 145 unubiquitinated His-S<sub>3</sub>R/M monomers, respectively. **(b)** Quantitative analyses of  
 146 immunoblots from **a**. Data are shown as mean ± S.D. (n = 3).

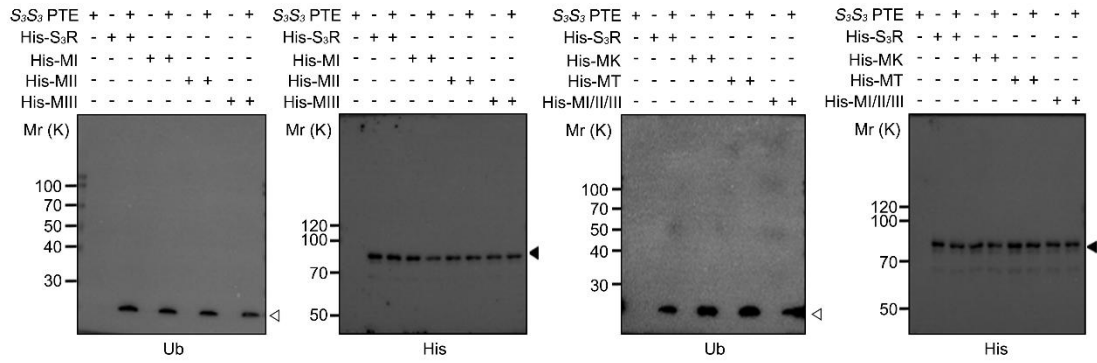

147

148 **Fig. S12. Ubiquitination of *Petunia hybrida* S<sub>3</sub>R and its mutant forms by self-**  
 149 **(*PhS<sub>3</sub>S<sub>3</sub>*) pollen-tube extracts (PTE).** Immunoblots of cell-free ubiquitination  
 150 products of His-tagged S<sub>3</sub>R and its mutant (M) forms incubated with self- (*PhS<sub>3</sub>S<sub>3</sub>*)  
 151 PTE using anti-ubiquitin (Ub) and -His antibodies. I, II and III: three ubiquitinated  
 152 regions of PhS<sub>3</sub>-RNase. K and T: lysine and threonine within six ubiquitinated  
 153 residues of PhS<sub>3</sub>-RNase. Annotations of this figure are identical to those of Fig. S11a.



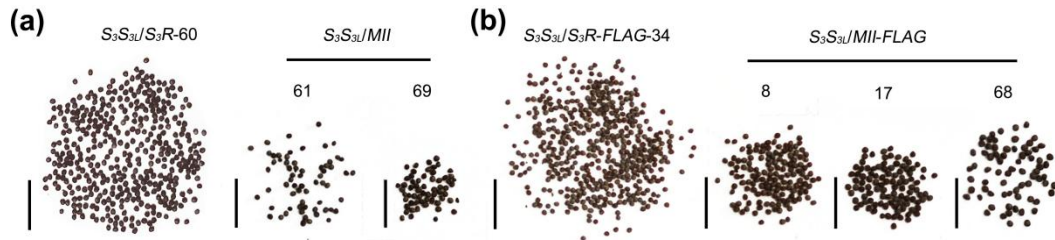

154

155 **Fig. S13. Reduced seed set per capsule from T<sub>0</sub> transgenic lines with mutated**  
 156 **region (R) II of *Petunia hybrida* S<sub>3</sub>-RNase.** The transgenic plants containing S<sub>3</sub>R or  
 157 *Mutant (M) II* (a) and S<sub>3</sub>R-FLAG or MII-FLAG (b) were pollinated with cross pollen  
 158 of *PhS<sub>V</sub>S<sub>V</sub>*. Numbers below the horizontal lines are T<sub>0</sub> transgenic line numbers. FLAG:  
 159 a protein tag. Bars: 5 mm.

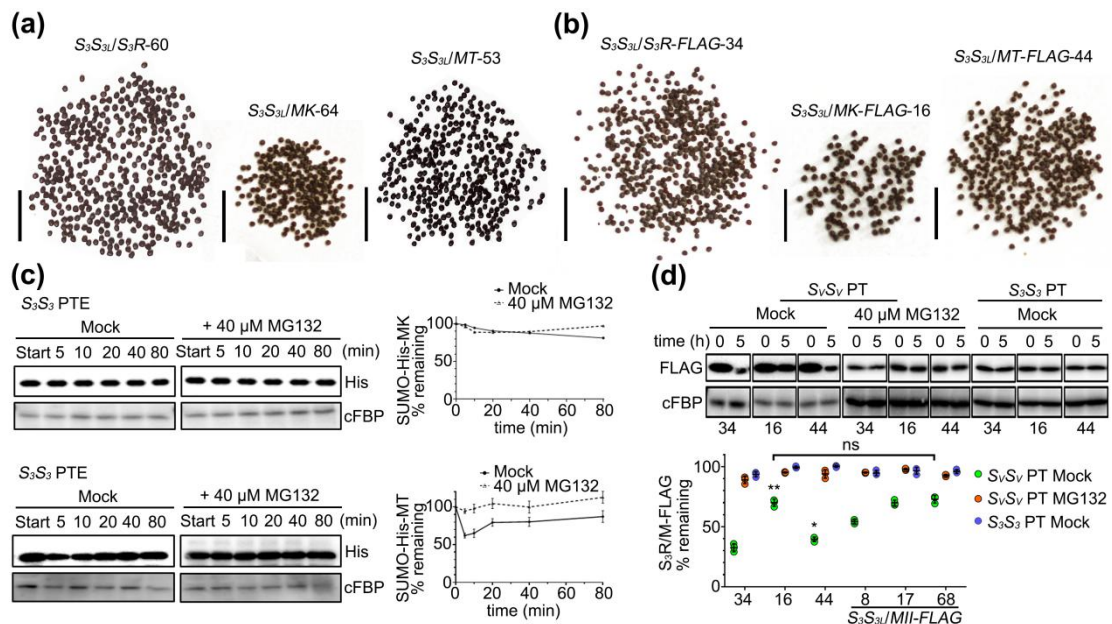

160

161 **Fig. S14. Reduced seed set per capsule from T<sub>0</sub> transgenic lines with mutated**  
 162 **lysine or threonine within the six ubiquitinated residues of *Petunia hybrida***  
 163 ***S<sub>3</sub>-RNase. (a) and (b) The transgenic plants containing *S<sub>3</sub>R*, mutant (*M*) *K* or *MT* (a)***  
 164 **and *S<sub>3</sub>R*-, *MK*- or *MT-FLAG* (b) were pollinated with cross pollen of *PhS<sub>v</sub>S<sub>v</sub>*. FLAG:**  
 165 **a protein tag. Bars: 5 mm. (c) Cell-free degradation of recombinant SUMO-His-MK,**  
 166 **and -MT by self (*PhS<sub>3</sub>S<sub>3</sub>*) pollen-tube extracts (PTE). Data are shown as mean ± S.D.**  
 167 **(n = 3). (d) Time-course analyses of MK- and MT-FLAG levels in the cross- (*PhS<sub>v</sub>S<sub>v</sub>*)**  
 168 **or self- (*PhS<sub>3</sub>S<sub>3</sub>*) pollen tubes (PT) incubated with or without MG132. The numbers**  
 169 **at the bottom of the immunoblots and the x-axis indicate the transgenic line numbers**  
 170 **corresponding to those in b. Data are shown as mean ± S.D. (n = 3). A student's**  
 171 ***t*-test was used to generate the *p* values. \*, *p* < 0.05; \*\*, *p* < 0.01; ns (not significant),**  
 172 ***p* > 0.05. Annotations of this figure are identical to those of Fig. S10.**

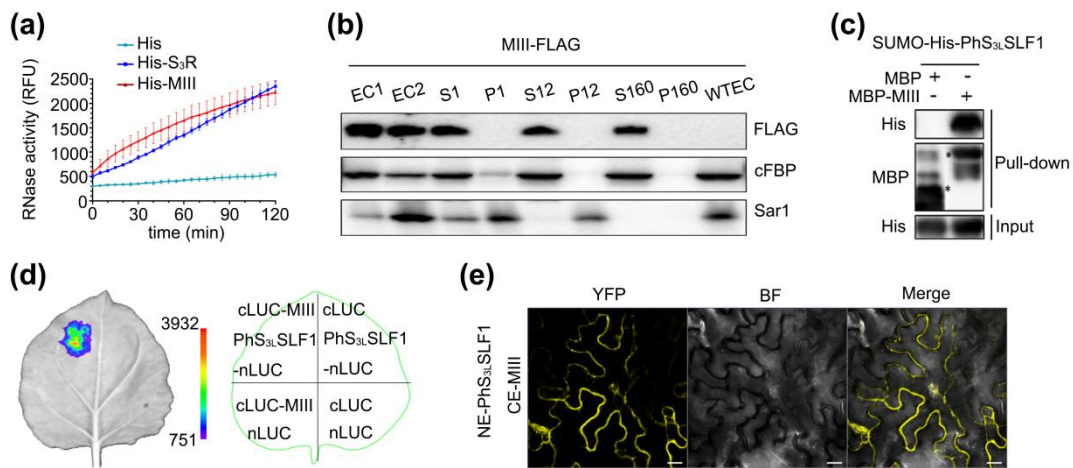

173

174 **Fig. S15. Mutant (M) III largely maintains the biochemical and physical**  
 175 **properties of *Petunia hybrida* S<sub>3</sub>-RNase. (a)** RNase activity detection of His-S<sub>3</sub>R  
 176 and -MIII expressed by *pCold-TF* vectors. Data are shown as mean ± S.D. (n = 3).  
 177 RFU: relative fluorescence unit. III: the ubiquitinated region III of PhS<sub>3</sub>-RNase. **(b)**  
 178 Immunoblot detection of FLAG-tagged MIII in subcellular fractions of *in vitro*  
 179 germinated pollen tubes. EC1, EC2 and WTEC indicate entire cell homogenates of  
 180 the pistils from the transgenic plants containing *MIII-FLAG*, the pollen tubes of  
 181 *PhS<sub>V</sub>S<sub>V</sub>* treated with EC1 and the pistils from wild-type *PhS<sub>3</sub>S<sub>3L</sub>*. S1 and P1, S12 and  
 182 P12, S160 and P160 indicate respective supernatant and pellet fractions obtained by  
 183 centrifugation of EC2 at 1,000 g, 12,000 g and 160,000 g. **(c)** The physical  
 184 interaction between PhS<sub>3L</sub>SLF1 and MIII detected by pull-down assay. MBP and  
 185 SUMO-His are protein tags. **(d)** SFLC assay. nLUC and cLUC indicate transiently  
 186 expressed N-terminal and C-terminal regions of luciferase. **(e)** BiFC assay. NE and  
 187 CE: transiently expressed N-terminal and C-terminal regions of YFP. YFP, BF and  
 188 Merge: YFP fluorescence, bright field and their merged field, respectively. Bars: 20  
 189 μm. Annotations of this figure are identical to those of Fig. S4.

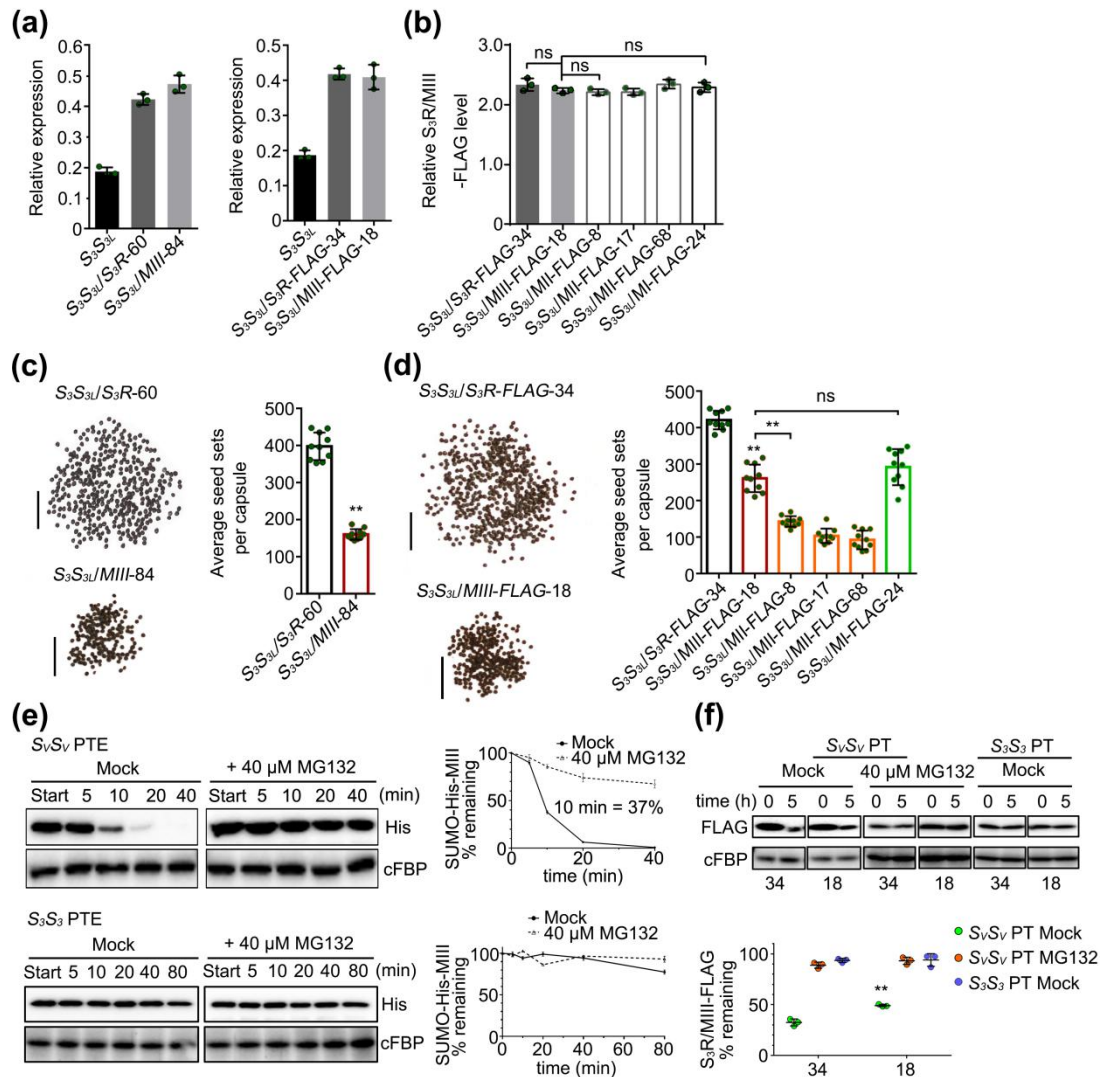

190

191 **Fig. S16. *Petunia hybrida* S<sub>3</sub>-RNase with mutated region (R) III markedly**  
 192 **reduces cross seed sets. (a)** Transcripts of transgene (*PhS<sub>3</sub>-RNase* or mutant (*M*) III)  
 193 and native *PhS<sub>3</sub>-RNase* detected by qRT-PCR. Data are shown as mean ± S.D. (n =  
 194 3). FLAG, a protein tag. **(b)** Quantitative analyses of S<sub>3</sub>R- and MIII-FLAG proteins  
 195 detected by immunoblots in Fig. S9. Data are shown as mean ± S.D. (n = 3).  
 196 Student's *t*-test: ns (not significant), *p* > 0.05. **(c)** Reduced seed sets per capsule from  
 197 cross-pollinated T<sub>0</sub> transgenic lines containing *MIII* and their statistical analyses.  
 198 Data are shown as mean ± S.D. (n = 10). Student's *t*-test: \*\*, *p* < 0.01. Bars: 5 mm.  
 199 **(d)** Reduced seed sets per capsule from cross-pollinated T<sub>0</sub> transgenic lines  
 200 containing *MIII-FLAG* and their statistical analyses. Data are shown as mean ± S.D.  
 201 (n = 10). Student's *t*-test: ns (not significant), *p* > 0.05; \*\*, *p* < 0.01. Bars: 5 mm. **(e)**



202 Left: immunoblots of recombinant SUMO-His-MIII in the cell-free degradation  
203 products incubated with or without MG132 (Mock). PTE: pollen-tube extracts. Right:  
204 quantitative analyses of the immunoblots. Data are shown as mean  $\pm$  S.D. (n = 3). **(f)**  
205 Top: immunoblots of MIII-FLAG levels in the cross- (*PhS<sub>V</sub>S<sub>V</sub>*) or self- (*PhS<sub>3</sub>S<sub>3</sub>*)  
206 pollen tubes (PT) incubated with or without MG132. Bottom: quantitative analyses  
207 of the immunoblots. The x-axis represents the transgenic line numbers corresponding  
208 to those in **d**. Data are shown as mean  $\pm$  S.D. (n = 3). Student's *t*-test: \*\*,  $p < 0.01$ .  
209 Annotations of this figure are identical to those of Fig. S10.

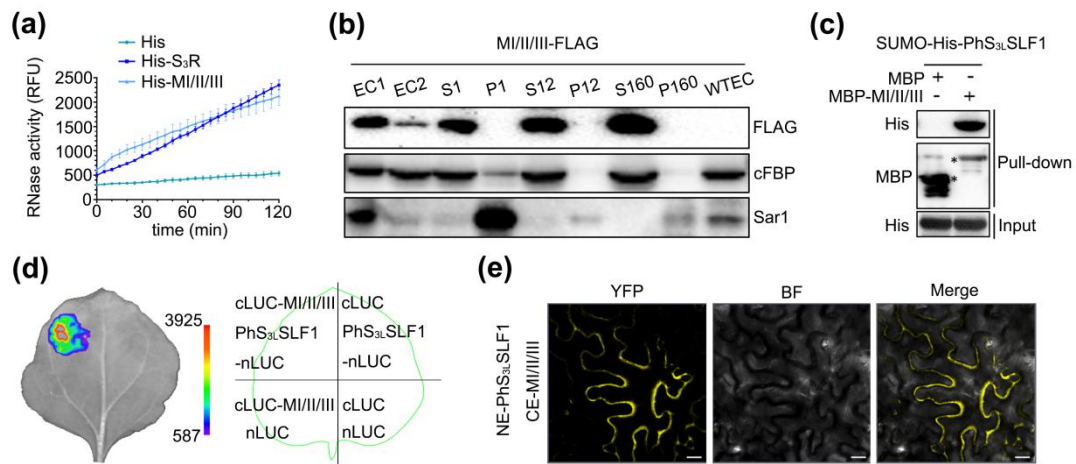

210

211 **Fig. S17. Largely unaltered physicochemical properties of *Petunia hybrida***  
 212 **S<sub>3</sub>-RNase with mutated region (R) I, II and III. (a)** RNase activity detection of  
 213 His-Mutant (M) I/II/III expressed by *pCold-TF* vectors. RFU: relative fluorescence  
 214 unit. Data are shown as mean ± S.D. (n = 3). **(b)** Immunoblot detection of  
 215 FLAG-tagged MI/II/III in subcellular fractions of *in vitro* germinated pollen tubes.  
 216 EC1, EC2 and WTEC indicate entire cell homogenates of the pistils from the  
 217 transgenic plants containing *MI/II/III-FLAG*, the pollen tubes of *PhS<sub>V</sub>S<sub>V</sub>* treated with  
 218 EC1 and the pistils from wild-type *PhS<sub>3</sub>S<sub>3</sub>L*. S1 and P1, S12 and P12, S160 and P160  
 219 indicate supernatant and pellet fractions obtained by centrifugation of EC2 at 1,000 g,  
 220 12,000 g and 160,000 g, respectively. **(c)** The physical interaction between  
 221 PhS<sub>3</sub>L-SLF1 and MI/II/III detected by pull-down assay. MBP and SUMO-His are  
 222 protein tags. **(d)** SFLC assay. nLUC and cLUC: transiently expressed N-terminal and  
 223 C-terminal regions of luciferase. **(e)** BiFC assay. NE and CE: transiently expressed  
 224 N-terminal and C-terminal regions of YFP. YFP, BF and Merge: YFP fluorescence,  
 225 bright field and their merged field. Bars: 20 μm. Annotations of this figure are  
 226 identical to those of Fig. S4.

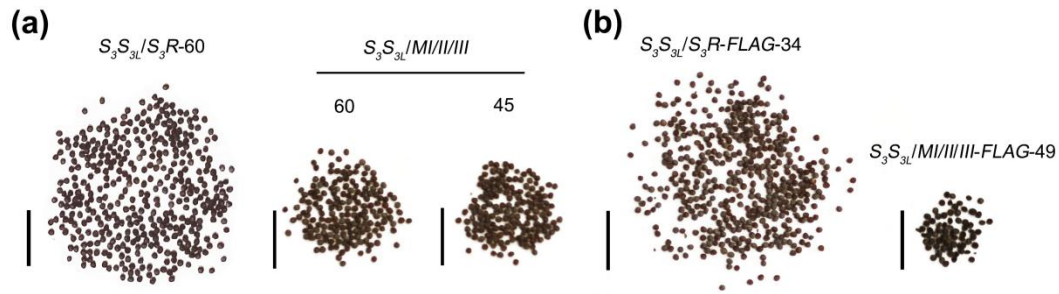

227

228 **Fig. S18. Reduced seed set per capsule from T<sub>0</sub> transgenic lines with mutated**  
 229 **region (R) I/II/III of *Petunia hybrida* S<sub>3</sub>-RNase.** The transgenic plants containing  
 230 *mutant (M) I/II/III (a)* or *MI/II/III-FLAG (b)* were pollinated with cross pollen of  
 231 *PhS<sub>V</sub>S<sub>V</sub>*. Numbers below the horizontal lines indicate T<sub>0</sub> transgenic line numbers.  
 232 FLAG: a protein tag. Bars: 5 mm.

233 **Table S1. List of primer sequences.**

| Primers                            | Sequences (5' to 3')                                   | Purposes |
|------------------------------------|--------------------------------------------------------|----------|
| <i>Chip-F</i>                      | ggtaccCTAGCTAGAAGATCTCTTTTGT                           | P1       |
| <i>Chip-R</i>                      | ctcgagCCTGGAGATCTAATTTTCTTTT                           | P1       |
| <i>S<sub>3</sub>R-F</i>            | ctcgagATGTTTAGATTACAGCTCATAT                           | P1       |
| <i>S<sub>3</sub>R-R</i>            | gagctcTCAACCCCGAAACAGAATCTT                            | P1       |
| <i>S<sub>3</sub>R-FLAG-R</i>       | gagctcCTACTTGTCATCGTCGTCCTTG<br>TAATCACCCCGAAACAGAATC  | P1       |
| <i>S<sub>3</sub>R-K217R-R</i>      | gagctcTCAACCCCGAAACAGAATCTCT                           | P1       |
| <i>S<sub>3</sub>R-K217R-FLAG-R</i> | gagctcCTACTTGTCATCGTCGTCCTTG<br>TAATCACCCCGAAACAGAATTC | P1       |
| <i>T102AK103R-F</i>                | TGACGAAACATACGCCAACGCC<br>AGACAACCTCTCTGGGAGC          | P2       |
| <i>T102AK103R-R</i>                | TCTGGCGTTGGCGTATGTTTCGT<br>CAAACCTCATTGAATCCA          | P2       |
| <i>T153AK154R-F</i>                | TCATGGAATTACTCCGGGAGCCA<br>GACATACATTTGGTGAAAT         | P2       |
| <i>T153AK154R-R</i>                | TCTGGCTCCCGGAGTAATTCCAT<br>GAGTTCTGAGAGTTGTCAA         | P2       |
| <i>T102A-F</i>                     | TGACGAAACATACGCCAACGCCA<br>AGCAACCTCTCTGGGA            | P2       |
| <i>T102A-R</i>                     | GGCGTTGGCGTATGTTTCGTCAA<br>ACCTCATTGAATCCA             | P2       |
| <i>K103R-F</i>                     | AAACATACGCCAACACTAGACAA<br>CCTCTCTGGGAGCACG            | P2       |
| <i>K103R-R</i>                     | TCTAGTGTTGGCGTATGTTTCGTC<br>AAACCTCATTGAAT             | P2       |
| <i>T153A-F</i>                     | TCATGGAATTACTCCGGGAGCCA<br>AGCATACATTTGGTGA            | P2       |



234 **Table S1 (Continued 1)**

| Primers                       | Sequences (5' to 3')                                     | Purposes |
|-------------------------------|----------------------------------------------------------|----------|
| <i>T153A-R</i>                | GGCTCCCGGAGTAATTCCATGAGT<br>TCTGAGAGTTGTCAA              | P2       |
| <i>K154R-F</i>                | GAATTACTCCGGGAACAAGACATA<br>CATTTGGTGAAATCC              | P2       |
| <i>K154R-R</i>                | TCTTGTTCCCGGAGTAATTCCATG<br>AGTTCTGAGAGTTGT              | P2       |
| <i>C118A-F</i>                | CAATAGGCATGGAATTTGCGCCAA<br>AAATCTCTACGATCA              | P2       |
| <i>C118A-R</i>                | GGCGCAAATTCCATGCCTATTGTA<br>TTCGTGCTCCCAGAG              | P2       |
| <i>18S rRNA-F</i>             | CGGCTACCACATCCAAGGAA                                     | P3       |
| <i>18S rRNA-R</i>             | TGTCACTACCTCCCCGTGTCA                                    | P3       |
| <i>S<sub>3</sub>R-F1</i>      | TCGTCTTAACATGGCCAGCA                                     | P3       |
| <i>S<sub>3</sub>R-R1</i>      | CCAGTGGCGCTCTAGAACAT                                     | P3       |
| <i>S<sub>3</sub>R-F2</i>      | ACCTCTCTGGGAGCACGAAT                                     | P3       |
| <i>S<sub>3</sub>R-R2</i>      | TCAAACCTATCTGCCGCTGG                                     | P3       |
| <i>S<sub>3</sub>R-F3</i>      | ACTCCGGGAACAAAGCATACA                                    | P3       |
| <i>S<sub>3</sub>R-R3</i>      | AGAATCTTCGTGCTGCTCGT                                     | P3       |
| <i>S<sub>3</sub>R-F</i>       | gaattcAGTGCGAATTTTGACTACTTCC                             | P4       |
| <i>S<sub>3</sub>R-R</i>       | gtcgacTCAACCCCGAAACAGAATCTTC                             | P4       |
| <i>S<sub>3</sub>R-K217R-R</i> | gtcgacTCAACCCCGAAACAGAATCTCT                             | P4       |
| <i>S<sub>3</sub>R-F</i>       | GGGGACAAGTTTGTACAAAAAAGCAG<br>CTCCAGTGCGAATTTTGACTACTTCC | P5       |
| <i>S<sub>3</sub>R-R</i>       | GGGGACCACTTTGTACAAGAAAGCTG<br>GGTCACCCCGAAACAGAATCTTCGTG | P5       |
| <i>S<sub>3</sub>R-K217R-R</i> | GGGGACCACTTTGTACAAGAAAGCTG<br>GGTCACCCCGAAACAGAATTCTCGTG | P5       |

235 **Table S1 (Continued 2)**

| Primers                       | Sequences (5' to 3')                                      | Purposes |
|-------------------------------|-----------------------------------------------------------|----------|
| <i>S<sub>3L</sub>SLF1-F</i>   | GGGGACAAGTTTGTACAAAAAAGCAG<br>CTCCATGGCGAATGGTATTTTAAAGA  | P5       |
| <i>S<sub>3L</sub>SLF1-R</i>   | GGGGACCACTTTGTACAAGAAAGCTG<br>GGTCAAATTTTGTACTTTTGTACTG   | P5       |
| <i>S<sub>3R</sub>-F</i>       | ggatccAGTGCGAATTTTGACTACTTCC                              | P6       |
| <i>S<sub>3R</sub>-R</i>       | ctcgagTCAACCCCGAAACAGAATCTTC                              | P6       |
| <i>S<sub>3R</sub>-K217R-R</i> | ctcgagTCAACCCCGAAACAGAATTCT                               | P6       |
| <i>S<sub>3L</sub>SLF1-F</i>   | ggatccATGGCGAATGGTATTTTAAAGA                              | P6       |
| <i>S<sub>3L</sub>SLF1-R</i>   | ctcgagCTAAAATTTTGTACTTTTGTA                               | P6       |
| <i>S<sub>3R</sub>-F</i>       | GGGGACAAGTTTGTACAAAAAAGCAG<br>GCTCCAGTGCGAATTTTGACTACTTCC | P7       |
| <i>S<sub>3R</sub>-R</i>       | GGGGACCACTTTGTACAAGAAAGCTG<br>GGTCACCCCGAAACAGAATCTTCGTG  | P7       |
| <i>S<sub>3R</sub>-K217R-R</i> | GGGGACCACTTTGTACAAGAAAGCTG<br>GGTCACCCCGAAACAGAATTCTTCGTG | P7       |

236 F: forward primer; R: reverse primer; P1: *pBII01* construction; P2: *Petunia hybrida*

237 *S<sub>3R</sub>* mutagenesis; *T* and *A*: threonine and its mutant form alanine; *K* and *R*: lysine

238 and its mutant form arginine; P3: qRT-PCR; P4: *pMAL-c2x* construction; P5: BiFC

239 or SFLC; P6: *pET30a* construction; P7: *pCold-TF* construction.

240 **Table S2. Names and accession numbers of S-RNases used in this study.**

| Names                                             | Accession numbers <sup>(a)</sup> |
|---------------------------------------------------|----------------------------------|
| <i>Petunia hybrida</i> S <sub>3</sub> -RNase      | U07363                           |
| <i>Petunia hybrida</i> S <sub>3L</sub> -RNase     | AJ271065                         |
| <i>Petunia hybrida</i> S <sub>V</sub> -RNase      | AJ271062                         |
| <i>Pyrus bretschneideri</i> S <sub>7</sub> -RNase | XM_009350009                     |
| <i>Petunia inflata</i> S <sub>2</sub> -RNase      | AAG21384                         |
| <i>Petunia inflata</i> S <sub>3</sub> -RNase      | AAA33727                         |
| <i>Petunia inflata</i> S <sub>k1</sub> -RNase     | BAE73275                         |
| <i>Petunia inflata</i> S <sub>1</sub> -RNase      | AAA33726                         |
| <i>Solanum lycopersicum</i> S <sub>3</sub> -RNase | XP_004229063                     |
| <i>Nicotiana alata</i> S <sub>A2</sub> -RNase     | AAA87045                         |
| <i>Petunia hybrida</i> S <sub>X</sub> -RNase      | AAA33729                         |
| <i>Petunia axillaris</i> S <sub>C2</sub> -RNase   | AAN76454                         |
| <i>Solanum tuberosum</i> S <sub>2</sub> -RNase    | Q01796                           |
| <i>Petunia hybrida</i> S <sub>B2</sub> -RNase     | BAA76514                         |
| <i>Solanum neorickii</i> S-RNase                  | BAC00940                         |
| <i>Solanum habrochaites</i> S <sub>2</sub> -RNase | AIG62995                         |
| <i>Solanum chilense</i> S <sub>1</sub> -RNase     | BAC00934                         |
| <i>Solanum chacoense</i> S <sub>11</sub> -RNase   | AAA50306                         |
| <i>Solanum chacoense</i> S <sub>14</sub> -RNase   | AAF36980                         |
| <i>Nicotiana alata</i> S <sub>7</sub> -RNase      | Q40381                           |
| <i>Petunia axillaris</i> S <sub>C1</sub> -RNase   | AAN76453                         |
| <i>Petunia hybrida</i> S <sub>11</sub> -RNase     | BAJ24848                         |
| <i>Petunia hybrida</i> S <sub>7</sub> -RNase      | BAJ24847                         |
| <i>Petunia axillaris</i> S <sub>1</sub> -RNase    | AAK15435                         |
| <i>Solanum habrochaites</i> S <sub>4</sub> -RNase | AIG62997                         |
| <i>Petunia hybrida</i> S <sub>1</sub> -RNase      | AAA60465                         |
| <i>Petunia hybrida</i> S <sub>B1</sub> -RNase     | BAA76513                         |

241 **Table S2 (Continued)**

| Names                                             | Accession numbers <sup>(a)</sup> |
|---------------------------------------------------|----------------------------------|
| <i>Solanum peruvianum</i> S <sub>22</sub> -RNase  | BAC00930                         |
| <i>Solanum peruvianum</i> S <sub>12</sub> -RNase  | AAA77040                         |
| <i>Solanum habrochaites</i> S <sub>1</sub> -RNase | AIG62994                         |
| <i>Petunia hybrida</i> S <sub>0</sub> -RNase      | ACT35737                         |
| <i>Solanum chacoense</i> S <sub>12</sub> -RNase   | AAD56217                         |
| <i>Nicotiana alata</i> S <sub>6</sub> -RNase      | AAB40028                         |
| <i>Solanum peruvianum</i> S <sub>3</sub> -RNase   | CAA53666                         |
| <i>Solanum peruvianum</i> S <sub>11</sub> -RNase  | AAA77039                         |
| <i>Nicotiana alata</i> S <sub>2</sub> -RNase      | P04007                           |
| <i>Petunia axillaris</i> S <sub>13</sub> -RNase   | AAK15436                         |

242 **(a)** Accession numbers are from National Center for Biotechnology Information243 (NCBI) protein database (<https://www.ncbi.nlm.nih.gov/>).

244 **Table S3. Seed sets of  $S_3S_{3L}/S_3R$  and  $S_3S_{3L}/S_3R$  (*Mutant*) (*M*)  $T_0$  transgenic plants**  
 245 **of *Petunia hybrida*.**

| $T_0$ transgenic lines <sup>(a)</sup> | Genotype of pollen donor             |                                    | Seed set <sup>(d)</sup> |
|---------------------------------------|--------------------------------------|------------------------------------|-------------------------|
|                                       | $S_3S_{3L}$ <sup>(b)</sup><br>(Self) | $S_VS_V$ <sup>(c)</sup><br>(Cross) |                         |
| $S_3S_{3L}/S_3R$ -60                  | 0/5                                  | 10/10                              | 398 ± 37                |
| $S_3S_{3L}/MI$ -28                    | 0/5                                  | 10/10                              | 332 ± 51                |
| $S_3S_{3L}/MI$ -63                    | 0/5                                  | 10/10                              | 268 ± 78                |
| $S_3S_{3L}/MI$ -50                    | 0/5                                  | 10/10                              | 259 ± 101               |
| $S_3S_{3L}/MII$ -61                   | 0/5                                  | 10/10                              | 89 ± 19                 |
| $S_3S_{3L}/MII$ -69                   | 0/5                                  | 9/10                               | 59 ± 6                  |
| $S_3S_{3L}/MK$ -64                    | 0/5                                  | 10/10                              | 207 ± 28                |
| $S_3S_{3L}/MT$ -53                    | 0/5                                  | 10/10                              | 356 ± 16                |
| $S_3S_{3L}/MIII$ -84                  | 0/5                                  | 10/10                              | 160 ± 14                |
| $S_3S_{3L}/MI/II/III$ -60             | 0/5                                  | 10/10                              | 207 ± 32                |
| $S_3S_{3L}/MI/II/III$ -45             | 0/5                                  | 10/10                              | 186 ± 17                |

246 **(a)** Numbers of  $T_0$  transgenic plants containing  $S_3R$  and its mutant forms (wild  
 247 type/transgene-line number). I, II and III indicate three ubiquitinated regions of  
 248 Ph $S_3$ -RNase. K and T indicate lysine and threonine within six ubiquitinated residues  
 249 of Ph $S_3$ -RNase. **(b)** Numbers represent those of mature capsules/pistils pollinated by  
 250 self pollen of  $S_3S_{3L}$ . **(c)** Numbers represent those of mature capsules/pistils pollinated  
 251 by cross pollen of  $S_VS_V$ . **(d)** Data are shown as average seed set per capsule ± S.D., n  
 252 ≥ 9.

253 **Table S4. Seed sets of  $S_3S_{3L}/S_3R$ -*FLAG* and  $S_3S_{3L}/S_3R$  (*Mutant*) (*M*)-*FLAG* T<sub>0</sub>**  
 254 **transgenic plants of *Petunia hybrida*.**

| T <sub>0</sub> transgenic lines <sup>(a)</sup> | Genotype of pollen donor             |                                    | Seed sets <sup>(d)</sup> |
|------------------------------------------------|--------------------------------------|------------------------------------|--------------------------|
|                                                | $S_3S_{3L}$ <sup>(b)</sup><br>(Self) | $S_VS_V$ <sup>(c)</sup><br>(Cross) |                          |
| $S_3S_{3L}/S_3R$ - <i>FLAG</i> -34             | 0/5                                  | 10/10                              | 421 ± 25                 |
| $S_3S_{3L}/MI$ - <i>FLAG</i> -24               | 0/5                                  | 10/10                              | 292 ± 49                 |
| $S_3S_{3L}/MII$ - <i>FLAG</i> -8               | 0/5                                  | 10/10                              | 143 ± 14                 |
| $S_3S_{3L}/MII$ - <i>FLAG</i> -17              | 0/5                                  | 10/10                              | 104 ± 19                 |
| $S_3S_{3L}/MII$ - <i>FLAG</i> -68              | 0/5                                  | 10/10                              | 93 ± 25                  |
| $S_3S_{3L}/MK$ - <i>FLAG</i> -16               | 0/5                                  | 10/10                              | 113 ± 17                 |
| $S_3S_{3L}/MT$ - <i>FLAG</i> -44               | 0/5                                  | 10/10                              | 334 ± 16                 |
| $S_3S_{3L}/MIII$ - <i>FLAG</i> -18             | 0/5                                  | 10/10                              | 261 ± 37                 |
| $S_3S_{3L}/MI/II/III$ - <i>FLAG</i> -49        | 0/5                                  | 10/10                              | 93 ± 34                  |

255 **(a)** Numbers of T<sub>0</sub> transgenic plants containing *FLAG*-tagged  $S_3R$  and its mutant  
 256 forms (wild type/transgene-line number). **(b, c)** Annotations are identical to those of  
 257 Table S3. **(d)** Data are shown as average seed set per capsule ± S.D., n = 10.
